# Supplementary material for: The stability and electronic and photocatalytic properties of the ZnWO4 (010) surface determined from first-principles and thermodynamic calculations
Source: Royal Society of Chemistry journal article supplement (doi:10.1039/d1ra03218f), 2021-01-01
Supplement: d1ra03218f1.pdf [file d1ra03218f1.pdf]

## **Supporting Information**

### **The stability, electronic, and photocatalytic properties of ZnWO<sub>4</sub> (010) surface determined from first-principles and thermodynamic calculations**

Yonggang Wu<sup>a,b</sup>, Jihua Zhang<sup>c</sup>, Bingwei Long<sup>a</sup>, Hong Zhang<sup>a\*</sup>

<sup>a</sup> College of Physics, Sichuan University, Sichuan, 610065, China

<sup>b</sup> School of Physics and Electronic Science, Guizhou Education University, Guiyang 550018, China

<sup>c</sup> Guizhou Provincial Key Laboratory of Computational Nano-Material Science, Guizhou Education University, Guiyang 550018, China

E-mail: hongzhang@scu.edu.cn

## 1. Optical Properties

The linear optical properties can be obtained from the frequency-dependent complex dielectric function

$$\varepsilon(\omega) = \varepsilon_1(\omega) + i\varepsilon_2(\omega) \quad [\text{A1}]$$

where  $\varepsilon_1(\omega)$  and  $\varepsilon_2(\omega)$  are the real and imaginary parts of the dielectric function, respectively, and  $\omega$  is the phonon energy. The imaginary part  $\varepsilon_2(\omega)$  of the dielectric function  $\varepsilon(\omega)$  is calculated using the standard formulation[1]

$$\varepsilon_2(\omega) = \frac{Ve^2}{2\pi\hbar m^2 \omega^2} \int d^3\mathbf{k} \sum_{n,n'} |\langle n\mathbf{k} | \mathbf{p} | n'\mathbf{k} \rangle|^2 f_{n\mathbf{k}} (1 - f_{n'\mathbf{k}}) \delta(E_{n\mathbf{k}} - E_{n'\mathbf{k}} - \hbar\omega) \quad [\text{A2}]$$

where  $V$  is the cell volume,  $\hbar\omega$  is the energy of the incident photon,  $\mathbf{p}$  is the momentum operator,  $|n\mathbf{k}\rangle$  denotes the electronic state  $\mathbf{k}$  in band  $n$ , and  $f_{n\mathbf{k}}$  is the Fermi occupation function. The real part  $\varepsilon_1(\omega)$  is related to  $\varepsilon_2(\omega)$  by the Kramer–Krönig transformation. The absorption coefficient  $\alpha(\omega)$  can be derived from  $\varepsilon_1(\omega)$  and  $\varepsilon_2(\omega)$  as follows[2, 3]

$$\alpha(\omega) = \frac{\sqrt{2}\omega}{c} [\sqrt{\varepsilon_1^2(\omega) + \varepsilon_2^2(\omega)} - \varepsilon_1(\omega)]^{1/2} \quad [\text{A3}]$$

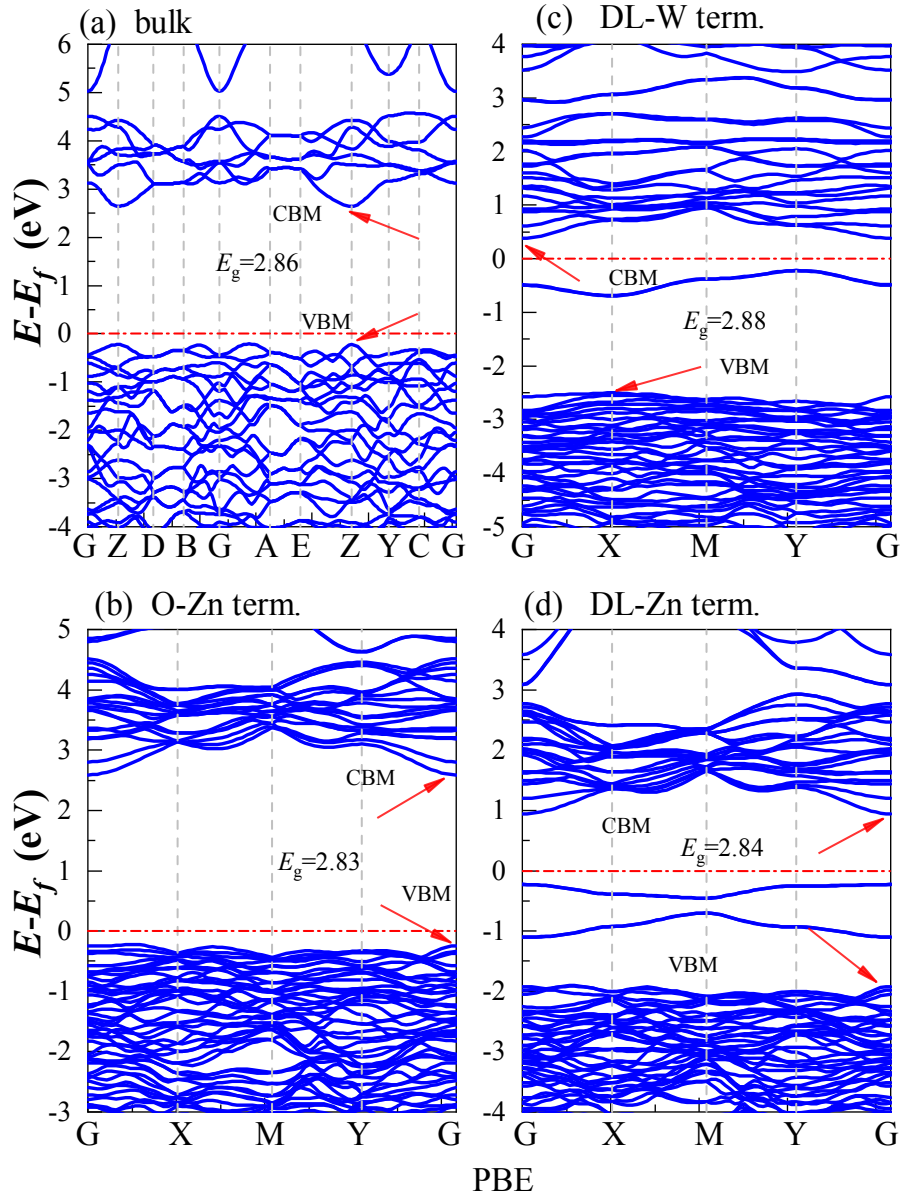

Fig. S1. The band structures of (a) bulk ZnWO<sub>4</sub> (b) O-Zn term., (c) DL-W term., and (d) DL-Zn term. for the ZnWO<sub>4</sub> (010) surface, which are obtained from the GGA-PBE calculations. The Fermi level is set to zero and indicated by a horizontal red dot-dash line.

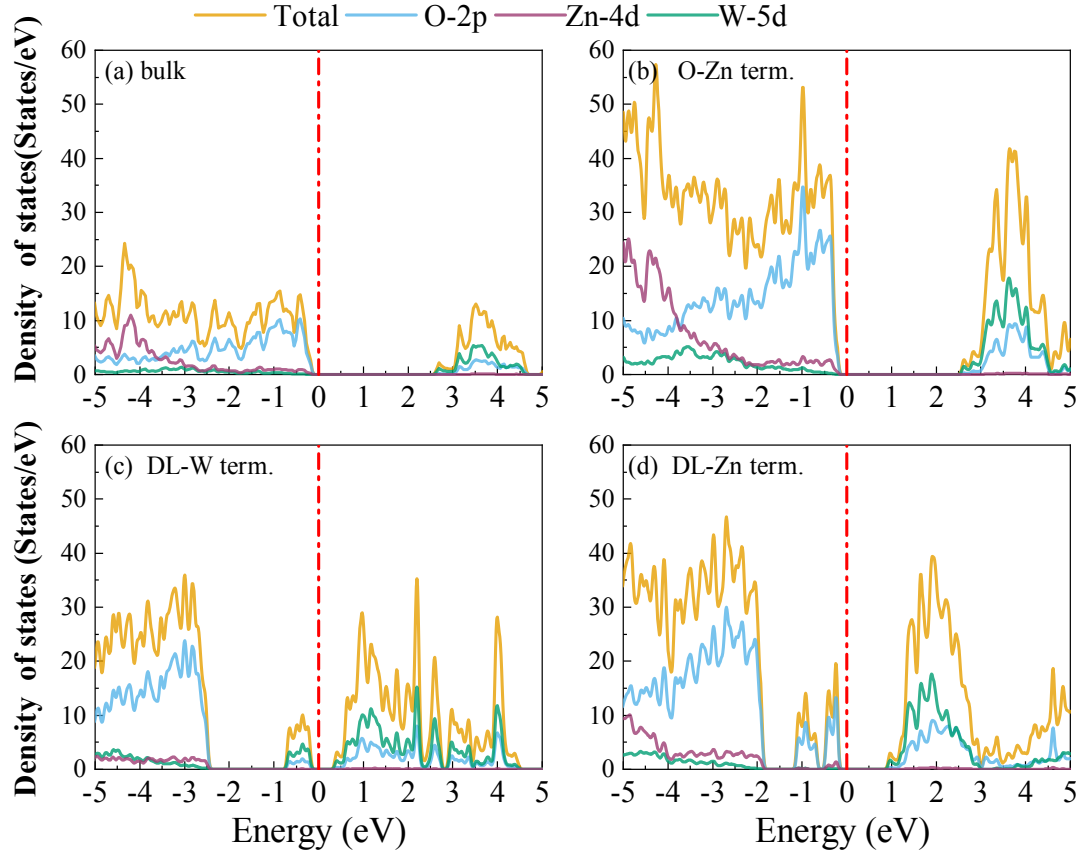

Fig. S2. The total density of states of (a) bulk ZnWO<sub>4</sub> (b) O-Zn term., (c) DL-W term., and (d) DL-Zn term., for the ZnWO<sub>4</sub> (010) surface, which are obtained from the GGA-PBE calculations. The Fermi level is set to zero and indicated by a perpendicular red dot-dash line.

(a) O-Zn term.

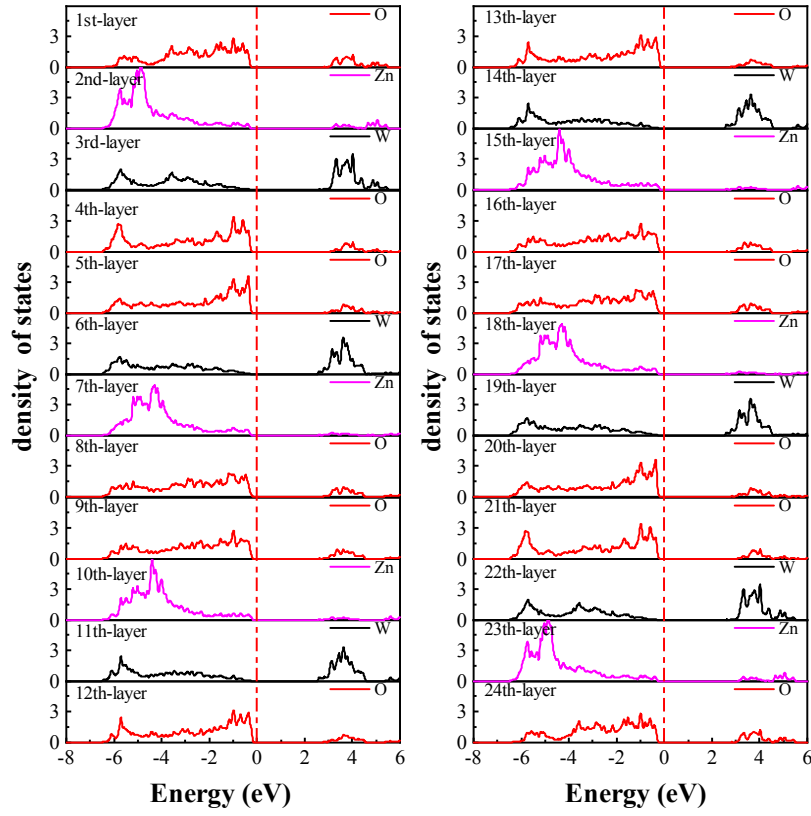

(c) DL-W term.

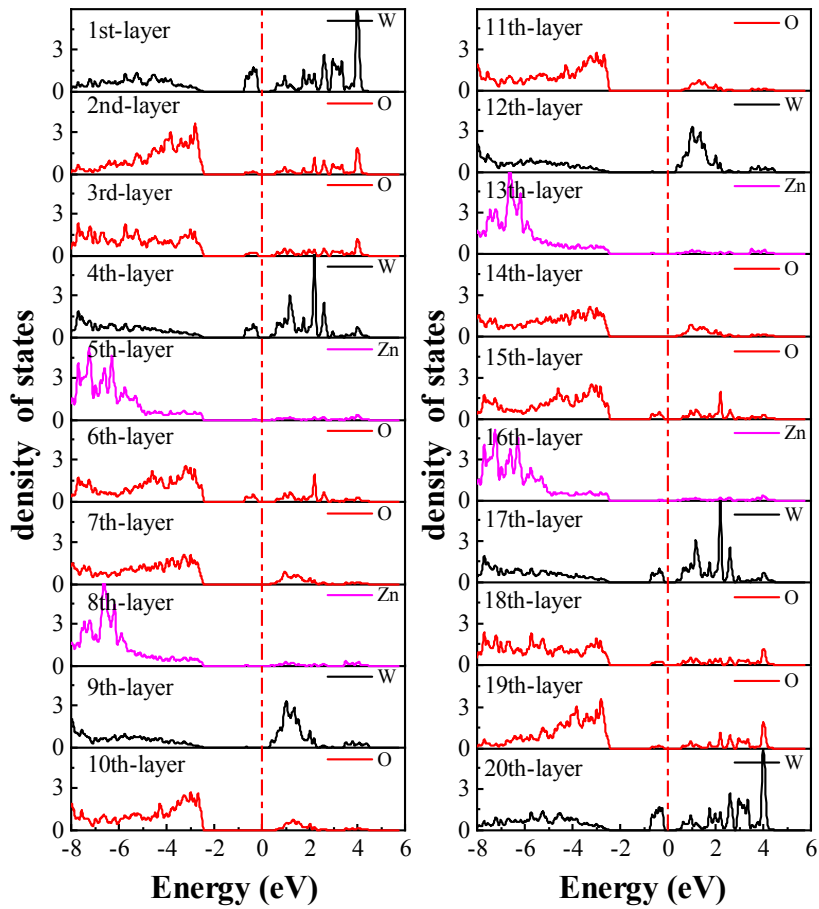

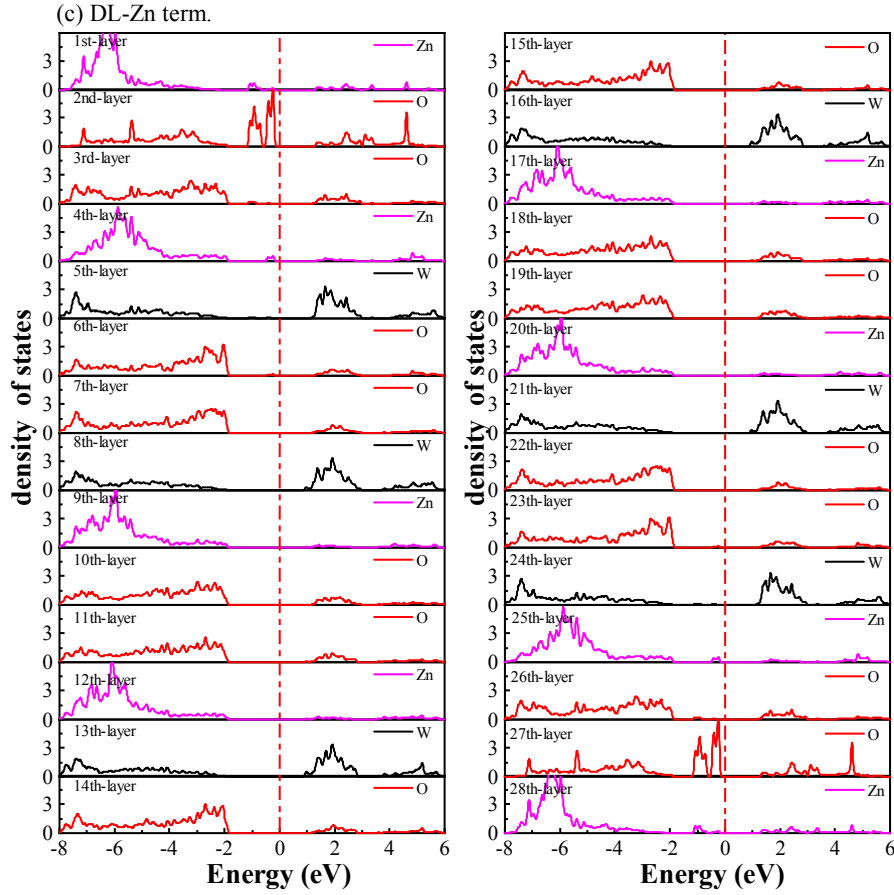

Fig. S3. The layer-resolved density of states of (a) O-Zn term., (b) DL-W term. (c) DL-Zn term., for  $\text{ZnWO}_4$  (010) surfaces, which are obtained from the GGA-PBE calculations. The Fermi level is set to zero and indicated by a perpendicular red dot-dash line.

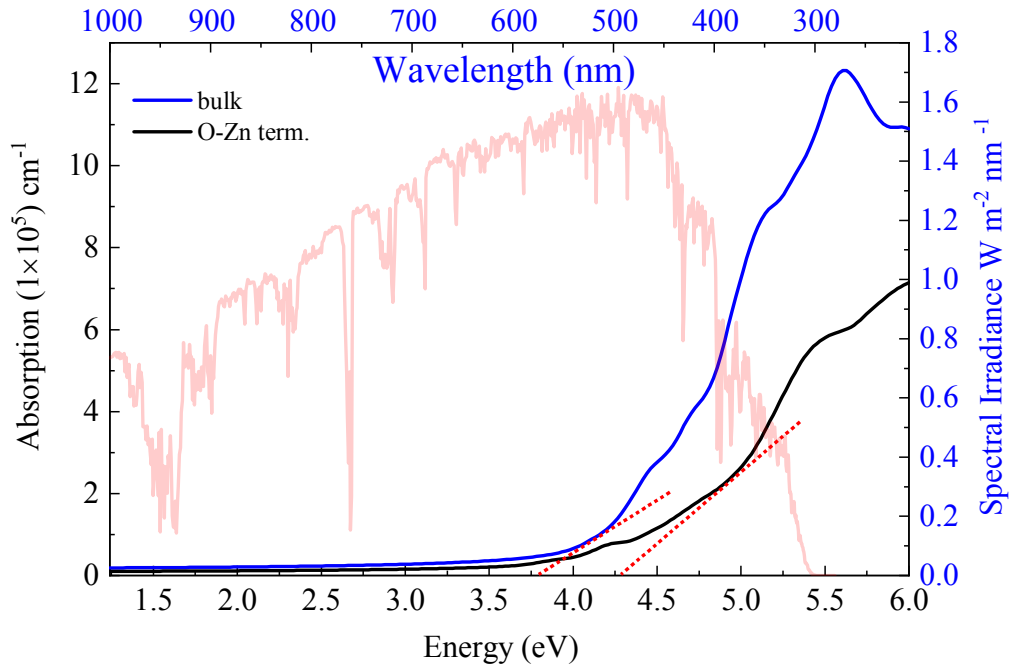

Fig. S4 Calculated the bulk  $\text{ZnWO}_4$  and O-Zn termination absorption coefficient using the HSE06 method, which overlaps the standard AM1.5 G solar flux incident.

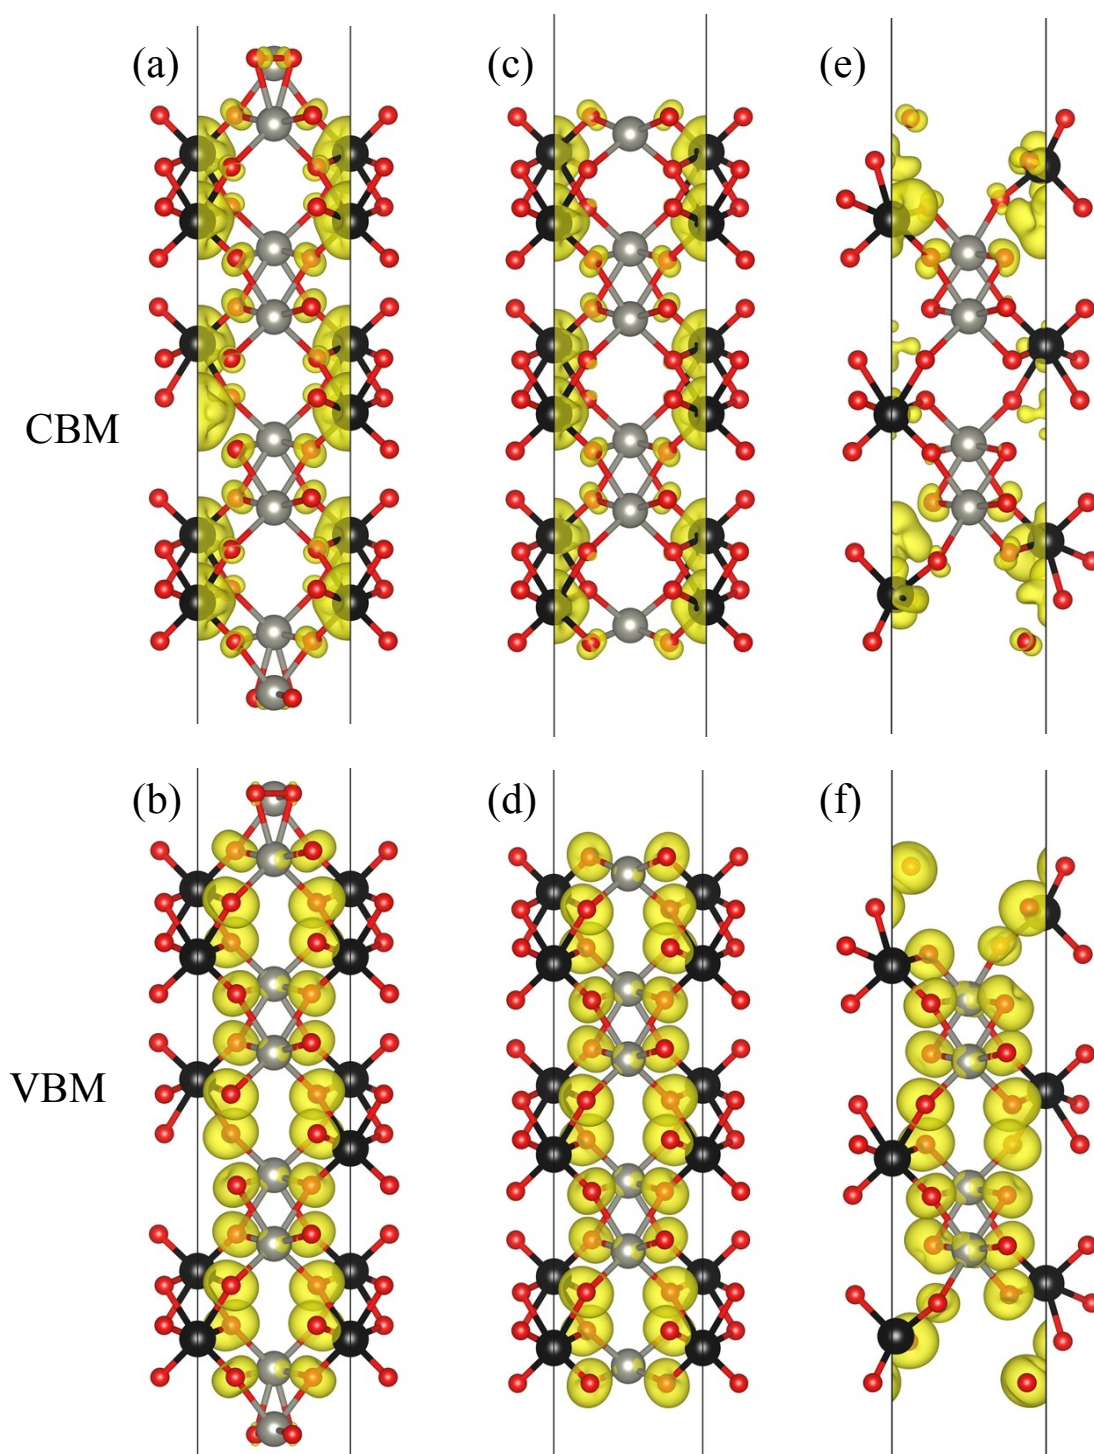

Fig. S5 The side views of partial charge density of the CBM and VBM for the DL-Zn, O-Zn, and DL-W terminations of  $\text{ZnWO}_4$  (010) surface (a) CBM of DL-Zn, (b) VBM of DL-Zn term., (c) CBM of O-Zn term., (d) VBM of O-Zn term. (e) CBM of DL-Zn term., (f) VBM of DL-Zn term. The isosurface values are  $0.0018 \text{ e}/\text{\AA}^3$ . The red, black and gray balls represent O, W, and Zn atoms, respectively.

1. J. Zhang, J. X. Cao, X. Chen, J. W. Ding, P. Zhang and W. Ren, *Phys. Rev. B*, **2015**, 91, 045417.
2. S. Saha, T. P. Sinha and A. Mookerjee, *Phys. Rev. B*, **2000**, 62, 8828-8834.
3. J. Zhang, M. Deng, Y. Yan, T. Xiao, W. Ren and P. Zhang, *Phys. Rev. Appl.*, **2019**, 11, 044052.
